# Supplementary material for: Nationwide Survey on Seasonal Influenza Vaccination among Health Care Workers during the COVID-19 Pandemic in Greece: Determinants, Barriers and Peculiarities
Source: MDPI journal article supplement (doi:10.3390/ijerph20136247), 2023-06-28

# Supplementary materials

## File S1. questionnaire

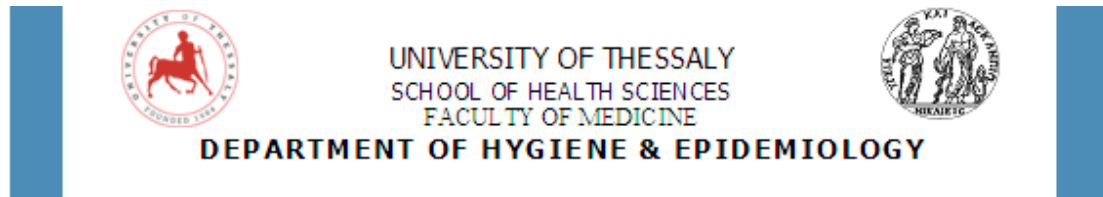

### QUESTIONNAIRE ON KNOWLEDGE, ATTITUDES AND PRACTICES OF HEALTH CARE PROFESSIONALS RELATED TO SEASONAL INFLUENZA VACCINATION

#### GENERAL SECTION

1. Age: ..... years
2. Gender: ☐ Male ☐ Female
3. Marital status (indicate with 'X'): ☐ Married ☐ Unmarried ☐ Other (please specify).....
4. Education level (indicate with 'X'):  
☐ High school ☐ Institute of Vocational Training (IEK)  
☐ Technological Educational Institute (TEI) ☐ Higher Education Institute/University (AEI) ☐  
Master /Doctoral
5. Health care profession (indicate with 'X'):  
☐ Doctor (please indicate specialization ..... ) ☐ Nurse  
☐ Medical Laboratory worker ☐ Other (please specify).....
6. Sector of employment (indicate with 'X'):  
☐ Private hospital ☐ Public hospital  
☐ Health centre (K.Y.) ☐ Community-based primary health unit (To. M.Y)
7. Health District (Υ.ΠΕ) of employment: .....
8. Regional Unit of employment: .....
9. Department of employment (indicate with 'X'): (please do not respond if you work at a health centre or community-based primary health unit)  
☐ Clinical ☐ Laboratory ☐ Other (please specify).....
10. Section of employment (indicate with 'X'): (please do not respond if you work at a health centre or community-based primary health unit)  
☐ Pathology ☐ Surgery  
☐ Laboratory ☐ Other (please specify).....
11. Years of practice: .....

#### SPECIFIC SECTION

12. Do you belong to a vulnerable/high risk group due to your medical history? (indicate with 'X'):  
(cardiovascular disease, respiratory disease, diabetes, immunosuppression, cancer, pregnancy etc.)  
☐ YES ☐ NO
13. Do you live with older individuals or individuals belonging to a vulnerable/high risk group due to their medical history? (indicate with 'X'):  
(cardiovascular disease, respiratory disease, diabetes, immunosuppression, cancer, pregnancy etc.)  
☐ YES ☐ NO
14. Please circle the choice that best indicates your response.

|  | Complete<br>ly agree | Agree | Neither agree nor<br>disagree | Disagree | Completely<br>disagree |
|--|----------------------|-------|-------------------------------|----------|------------------------|
|--|----------------------|-------|-------------------------------|----------|------------------------|

|                                                                                                     |   |   |   |   |   |
|-----------------------------------------------------------------------------------------------------|---|---|---|---|---|
| The HPV vaccine is recommended for all males up to 18 years of age in the country.                  | 1 | 2 | 3 | 4 | 5 |
| After the flu vaccination, certain foods are not permitted to be consumed for a period of 24 hours. | 1 | 2 | 3 | 4 | 5 |
| One of the contraindications of the flu vaccine is an allergy to eggs.                              | 1 | 2 | 3 | 4 | 5 |

**15. Please circle the choice that best indicates your response.**

|                                                                                                                                                   | Completely agree | Agree | Neither agree nor disagree | Disagree | Completely disagree |
|---------------------------------------------------------------------------------------------------------------------------------------------------|------------------|-------|----------------------------|----------|---------------------|
| Vaccinations are an important tool for the protection of public health and in particular of health professionals and workers in the health sector | 1                | 2     | 3                          | 4        | 5                   |
| Natural immunity acquired via disease is always preferable to immunity acquired via vaccination.                                                  | 1                | 2     | 3                          | 4        | 5                   |
| Many vaccines often have serious side effects.                                                                                                    | 1                | 2     | 3                          | 4        | 5                   |

**16. Are you the parent/guardian of one or more children? (indicate with 'X'):**

☐ YES ☐ NO

If **YES**, do you adhere to the child vaccination program suggested by the National Vaccination Program in the country? (please circle the answer of your choice)

☐ YES, I vaccinate my children according to the National Vaccination Program  
☐ I select and carry out some vaccinations ☐ I do not vaccinate my children

**17. Have you been vaccinated with the seasonal flu vaccine? (indicate with 'X'):**

☐ YES ☐ NO

If not, please indicate why (more than one response can be selected)

☐ I do not have time ☐ Apathetic  
☐ I use homeopathic remedies ☐ I do not think I am at risk  
☐ Fear regarding vaccine safety ☐ Other (please specify).....

**18. Which channels do you use to keep informed about the COVID-19 pandemic and the SARS-CoV-2 vaccine, and how often? (please circle the option that represents your answer)**

|                                                                          | Always | Often | Rarely | Never |
|--------------------------------------------------------------------------|--------|-------|--------|-------|
| Television                                                               | 1      | 2     | 3      | 4     |
| Social media channels (Facebook, Twitter, Instagram etc.)                | 1      | 2     | 3      | 4     |
| Newspaper (in print or electronic versions)                              | 1      | 2     | 3      | 4     |
| General interest publications/journals (in print or electronic versions) | 1      | 2     | 3      | 4     |
| Medical articles in journals (in print or electronic versions)           | 1      | 2     | 3      | 4     |
| Committee for infectious diseases at health facility                     | 1      | 2     | 3      | 4     |
| General interest websites                                                | 1      | 2     | 3      | 4     |
| Website of the Hellenic National Public Health Organization (NPHO)       | 1      | 2     | 3      | 4     |
| Website of the Hellenic Ministry of Health                               | 1      | 2     | 3      | 4     |
| Please specify other<br>.....                                            | 1      | 2     | 3      | 4     |

**19. Please circle the response below that represents your answer.**

|                                                                                                                 | Completel<br>y agree | Agree | Neither agree<br>nor disagree | Disagree | Completel<br>y disagree |
|-----------------------------------------------------------------------------------------------------------------|----------------------|-------|-------------------------------|----------|-------------------------|
| Some of the vaccines against SARS-CoV-2 which are approved and used in the country are based on mRNA technology | 1                    | 2     | 3                             | 4        | 5                       |
| The dosage regimen of the vaccines against SARS-CoV-2 includes 3 doses                                          | 1                    | 2     | 3                             | 4        | 5                       |
| There is evidence that mRNA technology interferes with the DNA of cells                                         | 1                    | 2     | 3                             | 4        | 5                       |

**20. Have you been or will you be vaccinated with any of the vaccines against the SARS-CoV-2 virus which causes COVID-19, which have received the necessary approvals from the European Medicines Agency and the National Medicines Agency? (indicate with 'X'):**

☐ YES      ☐ NO

**If not, please indicate why (indicate with 'X') (more than one response can be selected)**

- ☐ I do not have time
- ☐ Apathetic
- ☐ Fear regarding vaccine safety
- ☐ I do not think I am at risk
- ☐ I need further information in order to make a decision

Other (please specify) .....

**THANK YOU FOR YOUR TIME**

**Table S1.**

| Table 1. Univariate analysis of knowledge and attitudes towards SIV and COVID-19 vaccines/COVID-19 vaccination and SIV. (N=2592)                                                                                                           |                                                        |                                  |                                   |                                      |           |
|--------------------------------------------------------------------------------------------------------------------------------------------------------------------------------------------------------------------------------------------|--------------------------------------------------------|----------------------------------|-----------------------------------|--------------------------------------|-----------|
| Variables                                                                                                                                                                                                                                  | Yes (%)<br>Or<br>Correct (%)                           | Vaccinated<br>Yes/Correct<br>(%) | Vaccinated<br>No/Incorrect<br>(%) | Proportional<br>Ratio (PR) 95%<br>CI | Sig.      |
| 12. Do you belong to a vulnerable/high risk group due to your medical history?                                                                                                                                                             | 426 (16.4)                                             | 334 (78.4)                       | 1465 (67.7)                       | 1.16<br>(1.09-1.23)                  | <0.001(C) |
| 13. Do you live with older individuals or individuals belonging to a vulnerable/high risk group due to their medical history?                                                                                                              | 715 (27.6)                                             | 519 (72.6)                       | 1280 (68.2)                       | 1.06<br>(1.01-1.12)                  | 0.030(C)  |
| 14a, 14b, 14c<br>(Generic knowledge about vaccination)                                                                                                                                                                                     | 981 (37.8)                                             | 799 (81.4)                       | 1000 (62.1)                       | 1.31<br>(1.25-1.38)                  | <0.001(C) |
| 14a. The HPV vaccine is recommended for all males up to 18 years of age in the country                                                                                                                                                     | 1900 (73.3)                                            | 496 (72.0)                       | 1300 (68.4)                       | 1.05<br>(0.995-1.11)                 | 0.082(C)  |
| 14b. After the flu vaccination, certain foods are not permitted to be consumed for a period of 24 hours                                                                                                                                    | 1222 (47.1)                                            | 1072 (78.2)                      | 727 (59.5)                        | 1.32<br>(1.25-1.39)                  | <0.001(C) |
| 14c. One of the contraindications of the flu vaccine is an allergy to eggs                                                                                                                                                                 | 1185 (45.7)                                            | 931 (78.6)                       | 868 (61.7)                        | 1.27<br>(1.21-1.34)                  | <0.001(C) |
| 15a, 15b, 15c<br>(Attitudes towards vaccination)                                                                                                                                                                                           | 953 (36.8)                                             | 813 (85.3)                       | 986 (60.2)                        | 1.42<br>(1.35-1.49)                  | <0.001(C) |
| 15a Vaccinations are an important tool for the protection of public health, and in particular for health professionals and workers in the health sector                                                                                    | 2423 (93.5)                                            | 1743 (71.9)                      | 56 (33.1)                         | 2.17<br>(1.75-2.69)                  | <0.001(C) |
| 15b. Natural immunity acquired via disease is always preferable to immunity acquired via vaccination                                                                                                                                       | 1231 (47.5)                                            | 1105 (81.4)                      | 691 (56.1)                        | 1.45<br>(1.37-1.53)                  | <0.001(C) |
| 15c. Many vaccines often have serious side effects                                                                                                                                                                                         | 1250 (48.2)                                            | 1088 (81.3)                      | 708 (56.6)                        | 1.44<br>(1.36-1.52)                  | <0.001(C) |
| 19a, 19b, 19c<br>(Knowledge about COVID-19 vaccines)                                                                                                                                                                                       | 1290 (49.8)                                            | 1045 (81.0)                      | 754 (57.9)                        | 1.40<br>(1.33-1.48)                  | <0.001(C) |
| 19a. Some of the vaccines against SARS-CoV-2 which are approved and used in the country are based on mRNA technology                                                                                                                       | 2311 (89.2)                                            | 1652 (71.5)                      | 144 (52.0)                        | 1.38<br>(1.22-1.54)                  | <0.001(C) |
| 19b. The dosage regimen of the vaccines against SARS-CoV-2 includes 3 doses *                                                                                                                                                              | 1807 (69.7)                                            | 1336 (73.9)                      | 460 (59.0)                        | 1.25<br>(1.18-1.34)                  | <0.001(C) |
| 19c. There is evidence that mRNA technology interferes with the DNA of cells                                                                                                                                                               | 1648 (63.6)                                            | 1293 (78.5)                      | 503 (53.5)                        | 1.47<br>(1.37-1.56)                  | <0.001(C) |
| 20. Have you been or will you be vaccinated with any of the vaccines against the SARS-CoV-2 virus which causes COVID-19, which have received the necessary approvals from the European Medicines Agency and the National Medicines Agency? | 2101 (81.1)                                            | 1621 (77.2)                      | 177 (36.1)                        | 2.14<br>(1.89-2.41)                  | <0.001(C) |
| *16. Are you the parent/guardian of one or more children?                                                                                                                                                                                  | 1539 (59.4)                                            | 1083 (70.4)                      | 716 (68.0)                        | 1.04<br>(0.98-1.09)                  | 0.198(C)  |
| ** Do you adhere to the child vaccination                                                                                                                                                                                                  | YES, I vaccinate my children according to the National | 1501 (97.9)                      | 1065 (71.0)                       | 2.20<br>(1.32-3.67)                  | <0.001(C) |

|                                                                                                                    |                                          |          |           |      |  |  |
|--------------------------------------------------------------------------------------------------------------------|------------------------------------------|----------|-----------|------|--|--|
| program suggested by the National Vaccination Program in the country? (total 1533)                                 | Vaccination Program                      |          |           |      |  |  |
|                                                                                                                    | I select and carry out some vaccinations | 31 (2.0) | 10 (32.3) | Ref. |  |  |
|                                                                                                                    | I do not vaccinate my children           | 1 (0.1)  | 0 (0.0)   |      |  |  |
| *From 2592 respondents, 1053 did not have a child, ** 1533 (99.6%) responded from 1539 individuals who had a child |                                          |          |           |      |  |  |

**Figure S1** : Reasons for SIV and COVID-19 vaccine refusal

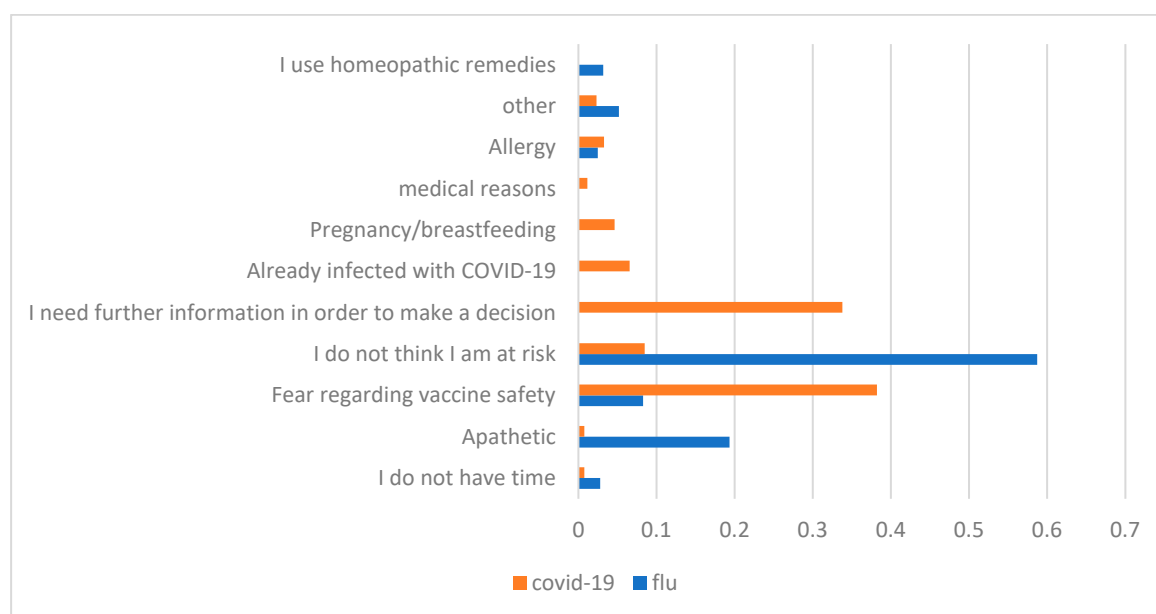

Supplement: s1 [file s1]
